# Supplementary material
Source: PubMed Central journal article supplement (PMC2572991)
Supplement: NIHMS71276-supplement-1.pdf [file NIHMS71276-supplement-1.pdf]

**Supplemental Table 1.** Health survey questions for secondary behavioral measures.

LDS-PROSCRIBED BEVERAGES

Do you drink alcoholic drinks of any kind?

If yes:

In the past 12 months, how many cans or bottles of beer or lite beer did you drink each week?

In the past 12 months, how many glasses of wine, wine coolers, sangria, or champagne did you drink each week?

In the past 12 months, how many drinks of mixed drinks or shots of liquor (such as tequila, gin, vodka, scotch, rum, whiskey, or liqueurs) did you drink each week?

Do you drink tea (any kind)?

If so, about how many cups per week?

Do you drink coffee?

If so, about how many cups per week?

RELIGIOUS OBSERVANCE

How often do you attend worship services?

Two or more times per week

About once a week

About once a month

Less than once a month

Never

Do you observe a day of rest (a day where your daily activities are primarily devoted to activities such as religious worship, meditation, prayer, reading, visiting with others, or such, and wherein your activities do not include your occupation, vigorous work, or exercise/conditioning)?

If yes, how often?

At least once a week

2-3 times per month

Once a month

Seldom

Never

#### RECEIPT OF SOCIAL SUPPORT

Do you have a family member or friend to whom you can talk about your health?

Do you have a family member or friend to whom you can talk about your personal problems?

Do you have a family member or friend on whom you can rely for financial support or material assistance if needed?

**Supplemental Table 2.** Survey questions for socioeconomic status.

Education

What is the highest education level you have completed?

Grade: 6 or less, 7, 8, 9, 10, 11, 12 (12=high school graduate)

College: 13, 14, 15, 16 (16=college graduate)

Technical/Vocational: 13, 14 (14=graduated)

Graduate school: 17, 18, 19, 20 (18=masters degree, 20=doctoral degree)

Income

What is your current gross household income per year (that is, your income or the combined income of you and your spouse, and any others who live in your home)?

Less than \$10,000

\$10,000-\$14,999

\$15,000-\$19,999

\$20,000-\$29,999

\$30,000-\$39,999

\$40,000-\$49,999

\$50,000-\$69,999

\$70,000-\$99,999

\$100,000 or more
